# Supplementary material for: Identification of a periodontal pathogen and bihormonal cells in pancreatic islets of humans and a mouse model of periodontitis
Source: PubMed Central journal article supplement (PMC7305306; doi:10.1038/s41598-020-65828-x), 2020-06-19

# Supplementary information

## Identification of a periodontal pathogen and bihormonal cells in pancreatic islets of humans and a mouse model of periodontitis

Vladimir Ilievski<sup>1</sup>, Peter T. Toth<sup>2,3</sup>, Klara Valyi-Nagy<sup>4</sup>, Tibor Valyi-Nagy<sup>4</sup>, Stefan J. Green<sup>5,6</sup>, Rosann S. Marattil<sup>7</sup>, Haider W. Aljewari<sup>8</sup>, Barton Wicksteed<sup>9</sup>, Neil M. O'Brien-Simpson<sup>10</sup>, Eric C. Reynolds<sup>10</sup>, Brian T. Layden<sup>9</sup>, Terry G. Unterman<sup>9,11</sup>, Keiko Watanabe<sup>1\*</sup>

<sup>1</sup>Department of Periodontics, College of Dentistry, University of Illinois at Chicago, Chicago, Illinois, United States of America

<sup>2</sup>Department of Pharmacology, College of Medicine, University of Illinois at Chicago, Chicago, Illinois, United States of America

<sup>3</sup>Fluorescence Imaging Core Facility, University of Illinois at Chicago, Chicago, Illinois, United States of America

<sup>4</sup>Department of Pathology, College of Medicine, University of Illinois at Chicago, Chicago, Illinois, United States of America

<sup>5</sup>Department of Biological Sciences, University of Illinois at Chicago, Chicago, Illinois, United States of America

<sup>6</sup>DNA Core Facility, University of Illinois at Chicago, Chicago, Illinois, United States of America

<sup>7</sup>Undergraduate Program, University of Illinois at Chicago, Chicago, Illinois, United States of America

<sup>8</sup>Post-Graduate Program in Periodontics, College of Dentistry, University of Illinois at Chicago, Chicago, Illinois, United States of America

<sup>9</sup>Division of Endocrinology, Diabetes & Metabolism, College of Medicine, University of Illinois at Chicago, Chicago, Illinois, United States of America

<sup>10</sup> Melbourne Dental School, University of Melbourne, Melbourne, Victoria, Australia.

<sup>11</sup> Jesse Brown VA Medical Center, Chicago, Illinois, United States of America

**Supplementary Figure S1. Pg is localized in  $\beta$ -cells.** (Separate channel images for Fig. 2A)

Representative immunofluorescence microscopy images showing the presence of Pg in  $\beta$ -cells in experimental mice. Yellow: glucagon, Green: insulin, Red: Pg, Blue: nuclei. Scale bar represents 50 $\mu$ m. Square represents an example of  $\beta$ -cells with Pg.

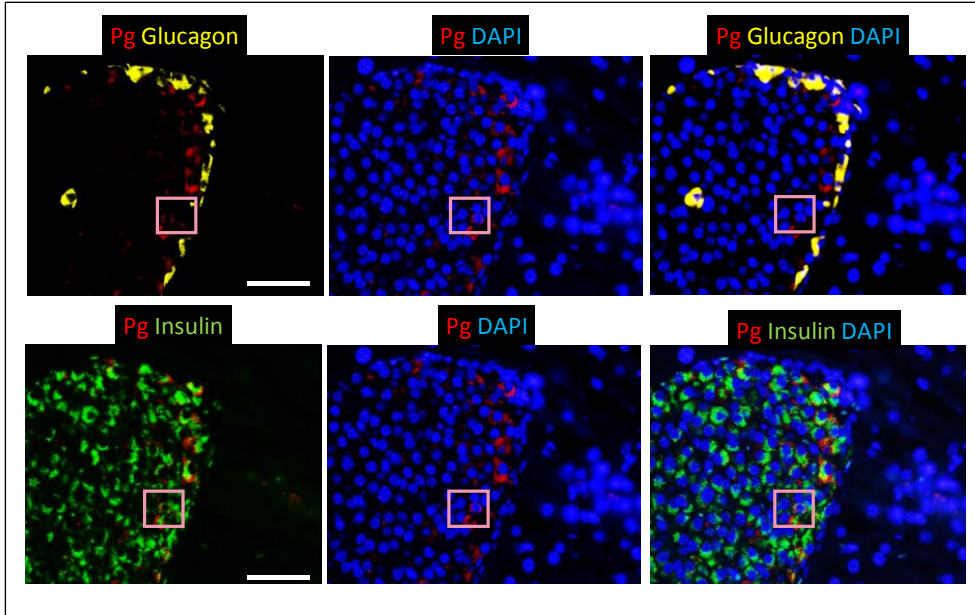

**Supplementary Figure S2. Bihormonal cells are evident in islets of the experimental group.** (Separate channel images for Fig. 3A)

Representative immunofluorescence microscopy images from a control animal (upper panel) which does not exhibit bihormonal cells and experimental animal (lower panel) which exhibit bihormonal cells. Yellow: glucagon, Green: insulin, Blue: nuclei. Scale bar represents 25 $\mu$ m. Rectangle represents an example of a bihormonal cell containing Pg (lower panel).

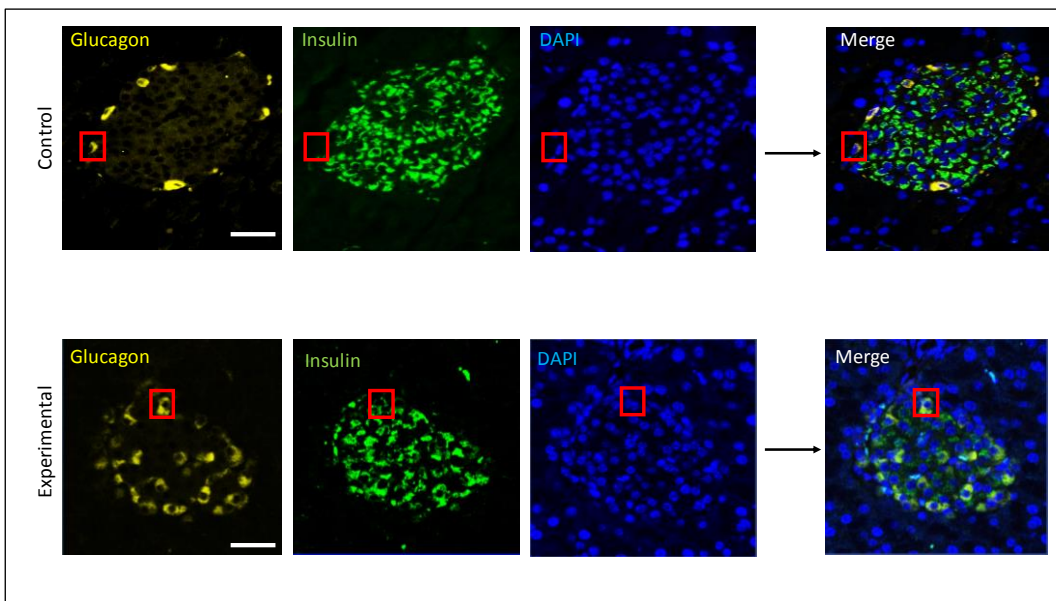

**Supplementary Figure S3. Bihormonal cells from both control and experimental groups express the  $\beta$ -cell transcription factor, Nkx6.1.** (Separate channel images for Fig 4A)

Mouse bihormonal cells express Nkx6.1. Representative immunofluorescence microscopy images showing the presence of Nkx6.1 in  $\beta$ -cells and bihormonal cells. Yellow: glucagon, Red: insulin, Green: Nkx6.1, Blue: nuclei. White rectangles show bihormonal cells expressing Nkx6.1. Scale bar represents 25 $\mu$ m.

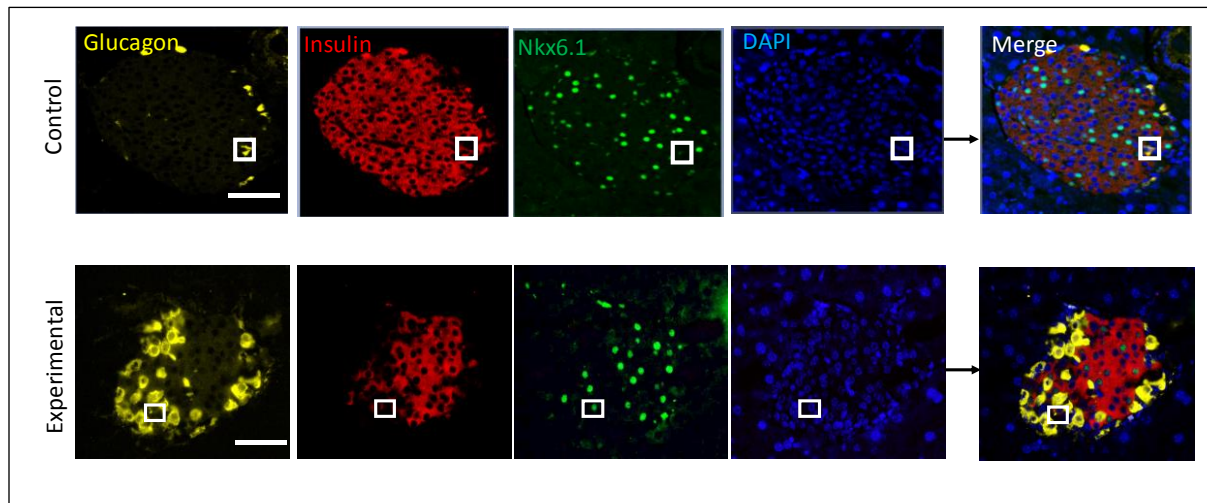

**Supplementary Figure S4. Bihormonal cells are present in human pancreata from Non-DM subjects.** (Separate channel images for Fig. 7A)

Representative immunofluorescence microscopy images showing the presence of bihormonal cells. Yellow: glucagon, Green: insulin, Blue: nuclei. Red squares show examples of bihormonal cells. Scale bar represents 25 $\mu$ m.

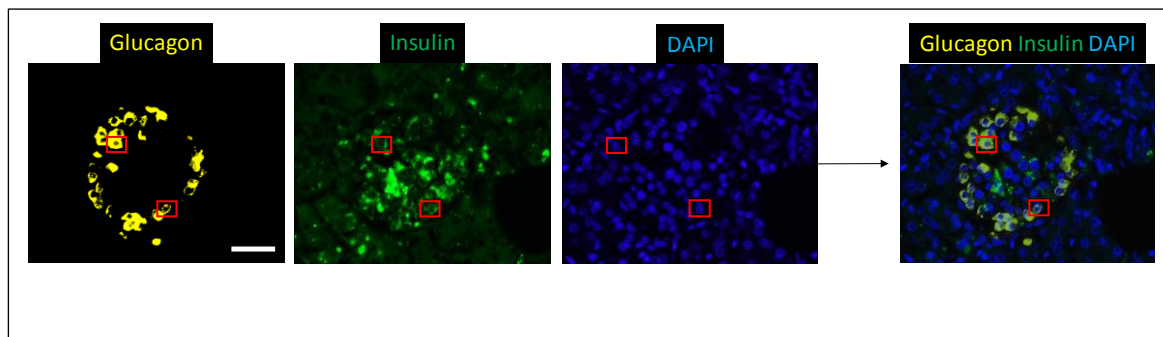

**Supplementary Figure S5. Human pancreatic bihormonal cells express Nkx6.1.**  
(Separate channel images for Fig. 8)

Representative images of bihormonal cells in human DM subjects expressing Nkx6.1. Yellow: glucagon, Red: insulin, green: Nkx6.1, Blue: nuclei. Rectangle shows an example of a bihormonal cell positive for Nkx6.1. Scale bar represents 10 $\mu$ m.

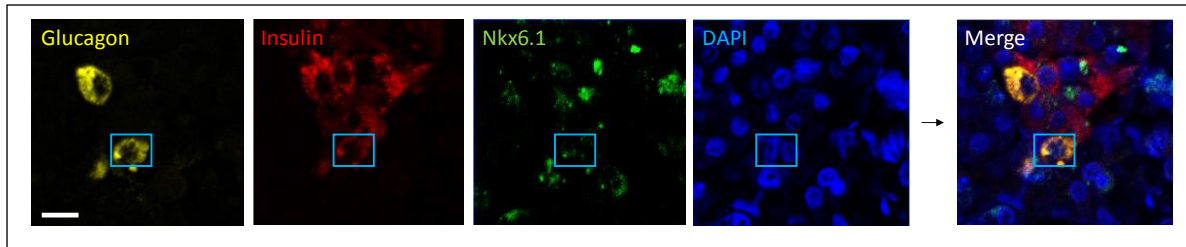

Supplement: 41598_2020_65828_MOESM1_ESM.pdf [file 41598_2020_65828_MOESM1_ESM.pdf]
